# Supplementary material
Source: ML conference proceedings conference paper supplement (https://proceedings.neurips.cc/paper_files/paper/2013/hash/53e3a7161e428b65688f14b84d61c610-Abstract.html)
Supplement: Supplementary file [file 53e3a7161e428b65688f14b84d61c610-Supplemental.zip]

## Appendix A: Proof of Theorem 1

First, we prove the claim for the condition **(a)**. Let us divide the interval  $[\theta_L, \theta_U]$  into finite number of segments so that, within each segment, the weight vector  $\mathbf{w}(\theta) := (w_1(\theta), \dots, w_n(\theta))^\top \in [0, 1]^n$  changes linearly with  $\theta$ , and denote the breakpoints of those segments as  $\theta_L = \theta_0 < \theta_1 < \dots < \theta_s < \dots < \theta_S = \theta_U$ , where  $S$  is the number of those segments.

Then, consider a segment defined on  $\theta \in [\theta_s, \theta_{s+1}]$ ,  $s \in \{0, \dots, S-1\}$ , and denote the weight vectors at  $\theta_s$  and  $\theta_{s+1}$  as  $\mathbf{w}(\theta_s)$  and  $\mathbf{w}(\theta_{s+1})$ , respectively. The problem of computing the solution path within this segment is written as the following parametric optimization problem

$$\tilde{\beta}_\mu \leftarrow \arg \min_{\tilde{\beta}} \sum_{i \in \mathbb{N}_n} ((1-\mu)w_i(\theta_s) + \mu w_i(\theta_{s+1})) \ell_{(1-\mu)\theta_s + \mu\theta_{s+1}}(r(y_i, \tilde{\beta}^\top \tilde{\mathbf{x}}_i)) + \gamma \beta^\top D^{-1} \beta \quad (10)$$

for  $\mu \in [0, 1]$ .

Since the loss function  $\ell_\theta$  does not depend on  $\theta$  and is convex piecewise-linear in  $r$ , we can write  $\ell_\theta$  as

$$\ell_\theta(r(y_i, \tilde{\beta}^\top \tilde{\mathbf{x}}_i)) = \sum_{h \in \mathbb{N}_H} \max\{\phi_{ih} + \psi_{ih} \cdot r(y_i, \tilde{\beta}^\top \tilde{\mathbf{x}}_i)\},$$

where  $\phi_{ih}, \psi_{ih} \in \mathbb{R}$ ,  $(i, h) \in \mathbb{N}_n \times \mathbb{N}_H$  are constants, and  $H$  is the number of pieces of the piecewise-linear loss function  $\ell_\theta$  (see, for example, section 4.3.1 of [22]).

Using slack variables  $\xi = (\xi_1, \dots, \xi_n) \in \mathbb{R}^n$ , the parametric programming problem in (10) is rewritten as

$$\begin{aligned} \{\tilde{\beta}_\mu, \xi_\mu\} &\leftarrow \arg \min_{\tilde{\beta}, \xi} ((1-\mu)\mathbf{w}(\theta_s) + \mu\mathbf{w}(\theta_{s+1}))^\top \xi + \gamma \beta^\top D^{-1} \beta \\ \text{s.t.} \quad &\xi_i \geq \phi_{ih} + \psi_{ih} \cdot r(y_i, \tilde{\beta}^\top \tilde{\mathbf{x}}_i) \text{ for all } (i, h) \in \mathbb{N}_n \times \mathbb{N}_H \end{aligned} \quad (11)$$

with respect to  $\mu \in [0, 1]$ . The problem (11) belongs to the class of *parametric QP* (note that, when  $\mu$  is fixed, the problem (11) is quadratic program with respect to  $\tilde{\beta}$  and  $\xi$ , which has a quadratic objective function and a set of linear constraints.). As shown, for example, in [6, 9], a parametric quadratic program which contains the parameter ( $\mu$ ) in the linear term of the quadratic objective function are shown to have a solution path in piecewise-linear form.

Similarly for the condition **(b)**, we consider a segment defined on  $\theta \in [\theta_t, \theta_{s+1}]$ ,  $s \in \{0, \dots, S-1\}$ , in which the weight vector  $\mathbf{w}(\theta)$  is constant (and thus omitted hereafter). Using slack variables  $\xi_{ih}$  for  $i \in \mathbb{N}_n$  and  $h \in \mathbb{N}_H$

$$\begin{aligned} &\min_{\tilde{\beta}} \sum_{i \in \mathbb{N}_n} \sum_{h \in \mathbb{N}_H} \max\{(a_h + b_h \cdot r(y_i, \tilde{\beta}^\top \tilde{\mathbf{x}}_i))(c_h + d_h \theta), 0\} + \gamma \beta^\top D^{-1} \beta \\ \Leftrightarrow &\min_{\tilde{\beta}} \sum_{h \in \mathbb{N}_H} (c_h + d_h \theta) \sum_{i \in \mathbb{N}_n} \max\{(a_h + b_h \cdot r(y_i, \tilde{\beta}^\top \tilde{\mathbf{x}}_i)), 0\} + \gamma \beta^\top D^{-1} \beta \\ \Leftrightarrow &\min_{\tilde{\beta}, \xi} \sum_{h \in \mathbb{N}_H} (c_h + d_h \theta) \sum_{i \in \mathbb{N}_n} \xi_{ih} + \gamma \beta^\top D^{-1} \beta \\ \text{s.t.} \quad &\xi_{ih} \geq a_h + b_h \cdot r(y_i, \tilde{\beta}^\top \tilde{\mathbf{x}}_i), \xi_{ih} \geq 0 \forall (i, h) \in \mathbb{N}_n \times \mathbb{N}_H. \end{aligned}$$

The parametric programming problem in Theorem 1 **(b)** is thus written as

$$\begin{aligned} \{\tilde{\beta}_\theta, \xi_\theta\} &\leftarrow \min_{\tilde{\beta}, \xi} \sum_{h \in \mathbb{N}_H} (c_h + d_h \theta) \sum_{i \in \mathbb{N}_n} \xi_{ih} + \gamma \beta^\top D^{-1} \beta \\ \text{s.t.} \quad &\xi_{ih} \geq a_h + b_h \cdot r(y_i, \tilde{\beta}^\top \tilde{\mathbf{x}}_i), \xi_{ih} \geq 0 \forall (i, h) \in \mathbb{N}_n \times \mathbb{N}_H \end{aligned}$$

for  $\theta \in [\theta_s, \theta_{s+1}]$ , and it also belongs to parametric QP, meaning that the optimal solution path is shown to be piecewise linear in  $\theta$ .  $\square$
